# Supplementary material for: Common Metabolites in Two Different Hypertensive Mouse Models: A Serum and Urine Metabolome Study
Source: MDPI journal article supplement (doi:10.3390/biom11091387), 2021-09-21
Supplement: s1 [file s1]

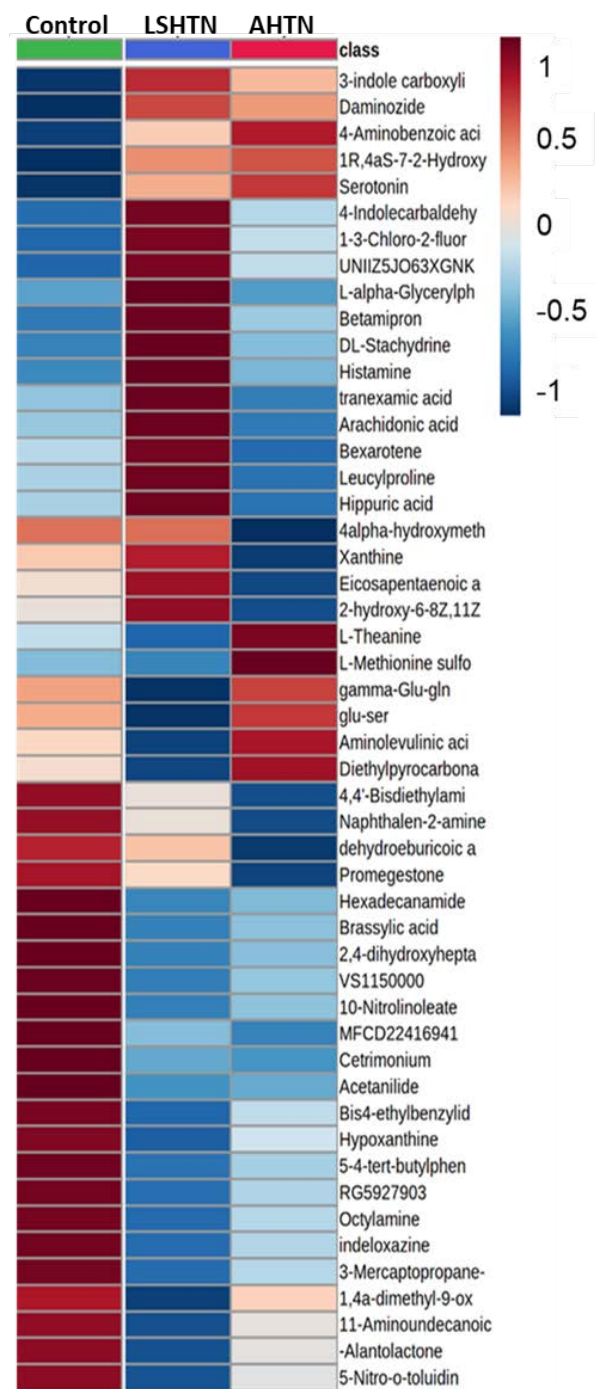

**Supplementary Figure S1:** Heatmap showing clustered average of top 50 metabolites in serum samples from Control, LSHTN, and AHTN mice.

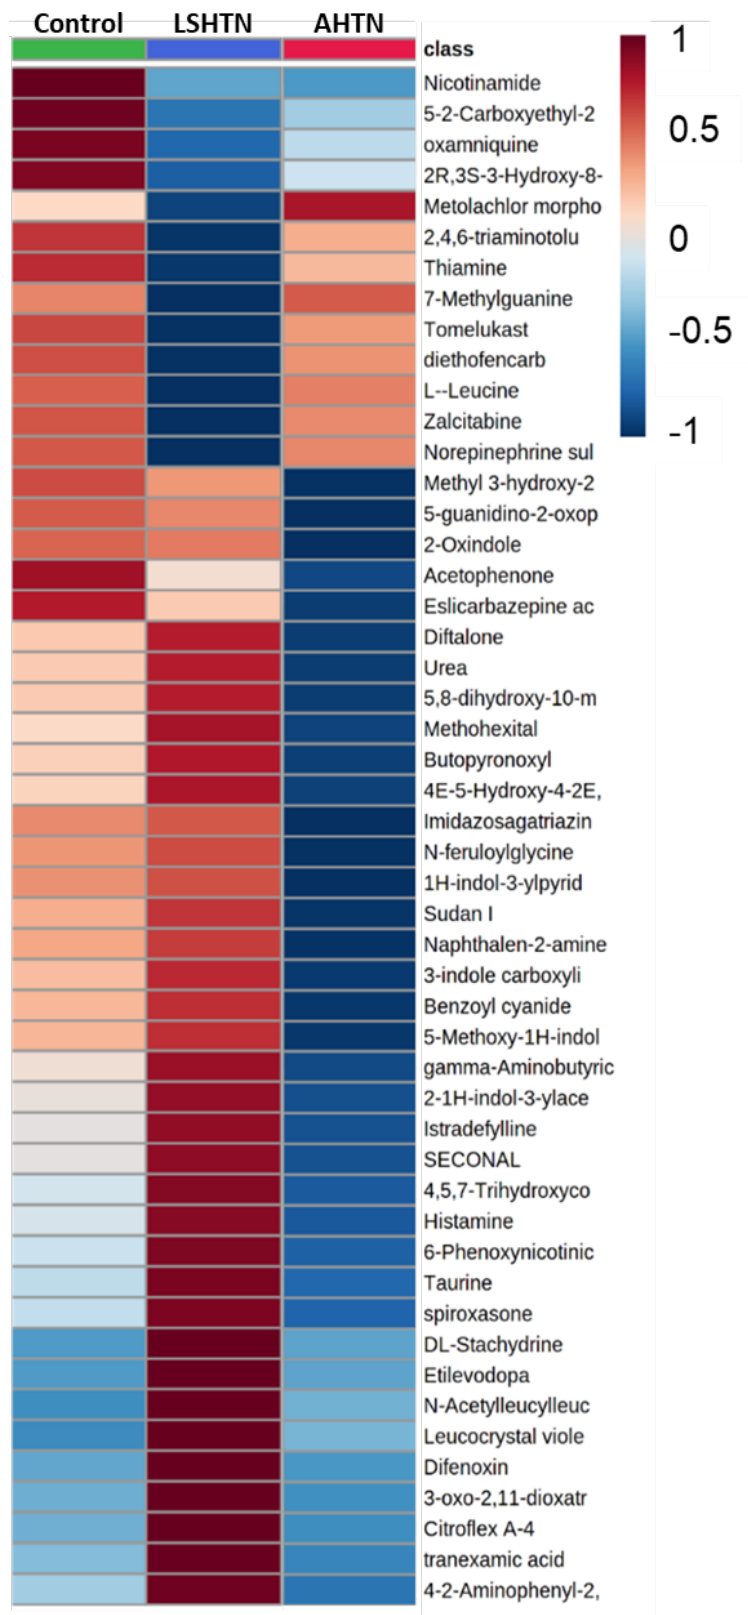

**Supplementary Figure S2:** Heatmap showing clustered average of top 50 metabolites in urine samples from Control, LSHTN, and AHTN mice.

**Supplementary Table S1:** Serum metabolites significantly altered in LSHTN mice compared to control mice.

| <b>Serum metabolites significantly altered in control vs. LSHTN</b> | <b>Fold Change</b> | <b><i>p</i> value</b> |
|---------------------------------------------------------------------|--------------------|-----------------------|
| 1-3-Chloro-2-fluorophenyl-3-dimethylaminoprop-2-en-1-one            | 2.5                | 0.003                 |
| 2-hydroxy-6-8Z,11Z-pentadeca-8,11,14-trien-1-ylbenzoic acid         | 2.3                | 0.001                 |
| 4-Indolecarbaldehyde                                                | 2.6                | 0.001                 |
| Bexarotene                                                          | 2.5                | 0.003                 |
| DL-Stachydrine                                                      | 3.1                | <0.001                |
| DL-Tryptophan                                                       | 2                  | 0.002                 |
| Eicosapentaenoic acid                                               | 2.3                | 0.001                 |
| Hippuric acid                                                       | 2.4                | 0.002                 |
| Indole-3-lactic acid                                                | 2.4                | 0.007                 |
| L-alpha-Glycerolphosphorylcholine                                   | 2.5                | <0.001                |
| Leucylproline                                                       | 2.5                | <0.001                |
| NP-020078                                                           | 2.9                | 0.002                 |
| tranexamic acid                                                     | 2.6                | <0.001                |
| trans-3-Indoleacrylic acid                                          | 2.5                | 0.004                 |
| Tryptophan degradation                                              | 3.2                | 0.007                 |
| Uric acid                                                           | 2.7                | 0.002                 |

**Supplementary Table S2:** Serum metabolites significantly altered in AHTN mice compared to control mice.

| <b>Serum metabolites significantly altered in control vs. AHTN</b> | <b>Fold Change</b> | <b><i>p</i> value</b> |
|--------------------------------------------------------------------|--------------------|-----------------------|
| 3'-Hydroxycotinine                                                 | 2                  | 0.005                 |
| L-Methionine sulfoxide                                             | 2.5                | 0.006                 |
